# Supplementary material for: Spleen Transcriptome Profiling Reveals Divergent Immune Responses to LPS and Poly (I:C) Challenge in the Yellow Drum (Nibea albiflora)
Source: MDPI journal article supplement (doi:10.3390/ijms24097735), 2023-04-23
Supplement: s1 [file s1]

We downloaded TLR protein sequences from NCBI database (<https://www.ncbi.nlm.nih.gov/>) for *Danio rerio*, *Larimichthys crocea*, *Cyprinus carpio*, *Miichthys miiuy* and *Argyrosomus japonicus* to construct blast database. BLASTP software (<https://blast.ncbi.nlm.nih.gov/Blast.cgi>) was used to perform homology searches for the yellow drum TLR protein sequences (threshold "--cut\_tc" is higher than all false positive). Meanwhile, the HMMER search tool (Hidden Markov Model, HMM, version 3.2.0) was used to find the TLR domain (Pfam-B\_571, <http://pfam.xfam.org/>) [57], and the yellow drum TLR protein sequences were searched globally by the HmmerSearch tool of the HMMER software [58]. Then both search results were intersected and short sequences less than 100 bp were excluded. A series of analysis tools used above were run on the Linux platform. Based on the nomenclature of the model species and closely related species, the yellow drum *TLR* gene family was named *NaTLRs*. the NJ phylogenetic tree was constructed using MegaX software, and the reliability of the phylogenetic tree was assessed using 1000 replicate sampling [59].

The results of sequence homology and evolutionary tree showed that the TLR gene family of the yellow drum includes *TLR1*, *TLR3*, *TLR5*, *TLR7* and *TLR11* subfamilies, with a total of 13 *TLR* genes and the absent of *TLR4* (**Figure S1**).

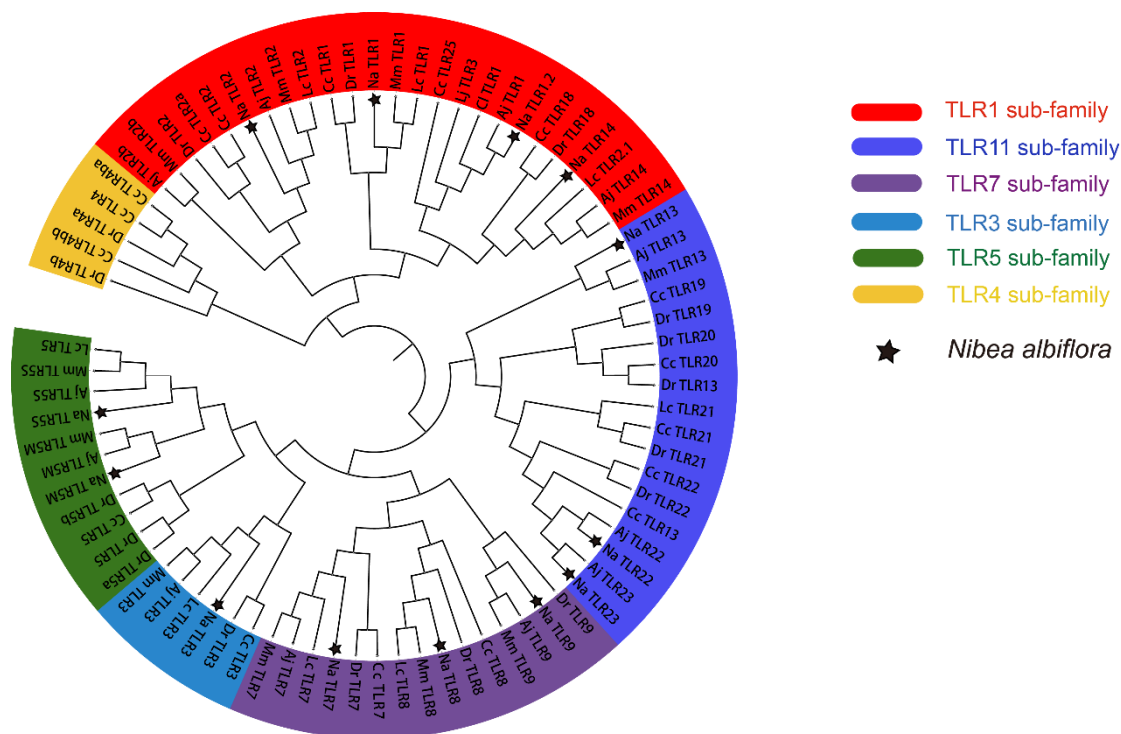

**Figure S1.** NJ phylogenetic tree based on TLR protein sequences of *Nibeia albiflora* (Na), *Danio rerio* (Dr), *Larimichthys crocea* (Lc), *Cyprinus carpio* (Cc), *Miichthys miiuy* (Mm) and *Argyrosomus japonicus* (Aj).
